# Supplementary material for: A Theoretical and Experimental Study on Esterification of Citric Acid with the Primary Alcohols and the Hydroxyl Groups of Cellulose Chain (n = 1-2) in Parched Condition
Source: Hindawi journal article supplement (doi:10.1155/2020/8825456), 2020-11-12
Supplement: f1 [file 8825456.f1.docx]

**SUPPORTING INFORMATION**

A theoretical and experimental study on esterification of citric acid with the primary alcohols and the hydroxyl groups of cellulose chain (n=1-2) in parched condition

**Dang T. Nguyen* , Quan T. Pham**

1. Some supporting information for computational data

*1.1.The calcultated data of the dehydration reaction step*

- *Table S1. Energy level of substances, products, and transition states of the dehydration reaction step*

| **Chemical** | **ESFC**  **(Hartree)** | **0.98 ZPE**  **(kcal/mol)** | **Eo**  **(kcal/mol)** |
| --- | --- | --- | --- |
| **CA** | -760.288285 | 94.6 | -476993.6 |
| **A5** | -683.8122435 | 77.7 | -429021.0 |
| **A6** | -683.8055734 | 77.7 | -429016.8 |
| **C** | -571.6639159 | 85.1 | -358639.4 |
| **Water** | -76.4474480 | 13.1 | -47958.4 |
| **Carbon dioxide** | -188.6411388 | 7.2 | -118336.9 |
| **TS_A5** | -760.,209676 | 91.1 | -476947.7 |
| **TS_A6** | -760.2173552 | 92.6 | -476951.1 |
| **TS_C** | -760.1619848 | 89.2 | -476919.7 |

***Note***

ESFC: Energy resulted from solving Schrodinger equation (in Hartree); is equal and opposite to the energy required to completely break up the molecule.

0.98ZPE: Energy level of the ground state, adjusted by 0.98 (for using B3LYP method).

Eo: Total energy of the molecule at 0 K, including E SFC and the adjusted ground state energy (in kcal/mol).

- The geometry structure and the input sample of TS_A6 transition state:


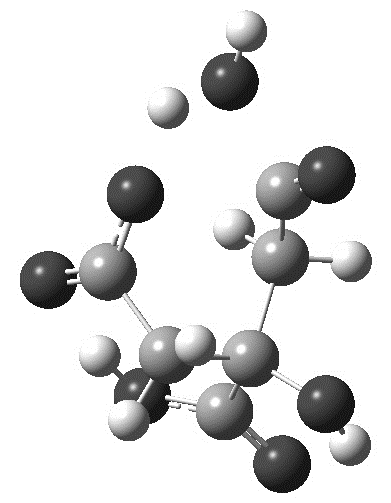


%chk=TS_A6.chk

# hf/3-21g test pop=none opt=(ts,calcfc,noeigentest)

Transition state TS_A6

0 1

C -4.47072481 0.49128325 -0.02031104

H -4.11407039 -0.51752675 -0.02031104

H -5.54072481 0.49129644 -0.02031104

C -3.95738259 1.21723953 -1.27771601

C -2.41738514 1.21965899 -1.27630873

H -2.05913540 0.21141532 -1.27495303

H -2.06071161 1.72373102 -2.15014819

C -3.83559114 1.34817730 1.20292050

C -1.86049244 1.95913608 0.00473662

O -2.75764263 2.44768547 0.89089595

H -2.03423806 2.32400401 1.84829076

O -2.36714455 1.18301414 1.78984960

H -2.00454297 0.35683767 2.20525781

O -0.82120969 2.58404770 -0.05276712

O -4.96538471 1.34927406 2.10629991

O -4.43616654 2.56470538 -1.27902405

H -4.95013927 2.72139029 -2.07456278

C -4.46842459 0.48965892 -2.53511910

O -4.49076555 -0.93969990 -2.57164662

H -3.94605725 -1.28695989 -1.86150343

O -4.86642635 1.14864017 -3.53056315

--link1--

%chk=TS_A6.chk

# B3LYP/6-311g(d,p) test guess=read opt=(ts, readfc, noeigentest) geom=allcheck freq

Transition state TS_A6

0 1

*2.2. The calcultated data of the ring opening reaction step*

- *Table S2. Energy level of substances, products, and transition states of the ring opening reaction step using 1G model*

| **Chemical** | **ESFC**  **(Hartree)** | **0.98 ZPE**  **(kcal/mol)** | **Eo**  **(kcal/mol)** |
| --- | --- | --- | --- |
| **1G** | -116.1035016 | 118.9 | -72737.2 |
| **TS_A51_1G** | -799.87101 | 196.3 | -501730.4 |
| **TS_A52_1G** | -799.8657091 | 195.4 | -501727.9 |
| **TS_A61_1G** | -799.8709959 | 196.8 | -501729.9 |

- The geometry structure and the input sample of TS_A61_1G transition state using 1G model, and the two-layer ONIOM method:


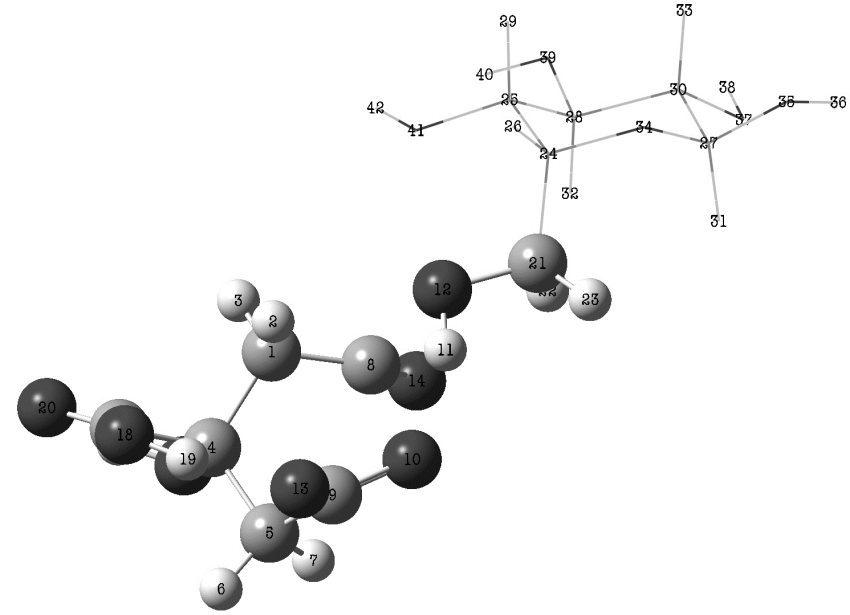


%chk=TS_A61_1G.chk

%mem=100MW

# oniom(b3lyp/6-311g(d,p):pm3mm) test opt=(ts,calcfc,noeigentest) freq

Transition state TS_A61_1G

0 1 0 1 0 1

C 0 -0.10138800 -0.79633000 -0.40285500 H

H 0 -0.01210700 -0.13746700 -1.26305300 H

H 0 -0.05654500 -1.83445900 -0.74264800 H

C 0 -1.46930400 -0.59516400 0.35915600 H

C 0 -1.41786700 0.64566700 1.27593100 H

H 0 -2.42735200 1.00946900 1.46769100 H

H 0 -0.96125000 0.34335200 2.21790800 H

C 0 1.07055700 -0.59251400 0.48392600 H

C 0 -0.55201500 1.69016300 0.57335700 H

O 0 0.70755100 1.52848200 0.77480800 H

H 0 1.86741700 1.18393400 -0.32642600 H

O 0 2.28651900 0.33799000 -0.65931400 H

O 0 -1.06460400 2.47171300 -0.23634800 H

O 0 1.60710200 -1.05097000 1.39423900 H

O 0 -1.75560500 -1.73379000 1.12323800 H

H 0 -2.39341500 -2.24299200 0.59266600 H

C 0 -2.56356500 -0.46167000 -0.74582500 H

O 0 -2.72260600 0.70203200 -1.34896700 H

H 0 -2.18184600 1.44806300 -0.95694400 H

O 0 -3.21801900 -1.44030000 -1.02002400 H

C 0 3.67022300 0.26069200 -0.23263100 H

H 0 3.69351000 0.08923800 0.84822500 H

H 0 4.12314700 1.23328700 -0.43759700 H

C 0 4.37398527 -0.87115643 -1.00414756 L H 21

C 0 4.85463809 -1.92419932 -0.02655973 L

H 0 3.62146902 -1.32205382 -1.70189560 L

C 0 6.60694941 0.25013430 -0.89159903 L

C 0 5.93620749 -1.37968291 0.88401735 L

H 0 5.25463792 -2.80489514 -0.59475441 L

C 0 7.08767898 -0.80231853 0.08655654 L

H 0 6.20594194 1.13074463 -0.32407606 L

H 0 5.50237092 -0.58235098 1.54310274 L

H 0 7.60206503 -1.62590960 -0.47512254 L

O 0 5.52626732 -0.29566199 -1.80264326 L

O 0 7.70848472 0.71140499 -1.67820524 L

H 0 7.97586603 1.58234984 -1.37561262 L

O 0 8.04623653 -0.22609316 0.97764113 L

H 0 8.73924417 -0.86502595 1.15958977 L

O 0 6.41808479 -2.42430375 1.73340628 L

H 0 5.94705110 -2.40038102 2.56956115 L

O 0 3.75324665 -2.38507146 0.76048142 L

H 0 3.55216514 -3.29470361 0.52867205 L

1. Some supporting information for experimental data
   1. *DTA-TG spectra of citric acid monohydrate*


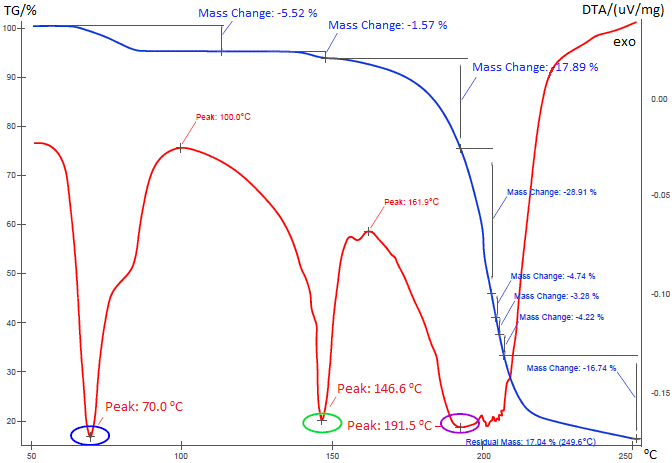


Figure S1. DTA-TG spectra of citric acid monohydrate [39]

DTA – TG spectra of citric acid monohydrate appear the two peaks at 146.6 oC and 191.5 oC, mass change in the temperature range is -17.89 wt % (equivalent with 37.4 gram/mole). The stage is respective to release the two water molecules from citric acid. This result proves that citric acid is dehydrated to form cyclic alhydrides and it is not decarboxylated in the decomposition process.

- 1. *SEM images and FT-IR spectra of modified lignocellulosic materials*

SEM images of cotton before and after modification show that the diameter of fibers are unchanged and dispersed in the range from 10 to 15 *µ*m. The surface of modified cotton is heterogeneous. Many white colour dots were exposed the outside surface through the crevices (seen in Figure S2 I,II). Fourier transform infrared spectroscopy (FT-IR) spectra of the modified materials appear a strong vibration peak of the C=O group in the -COO- ester groupat the wavenumber of 1737 cm-1 in the case of modified cotton (seen in Figure S3) and at the wavenumber of 1741 cm-1 in the case of modified coconut shell powder [36]. However, it does not appear the speciality peak of the C=C double bond. These results proved that a chemical linkage was formed between CA and the hydroxyl groups of the cellulose chain; and the esterification reaction occurs through CA anhydrides.


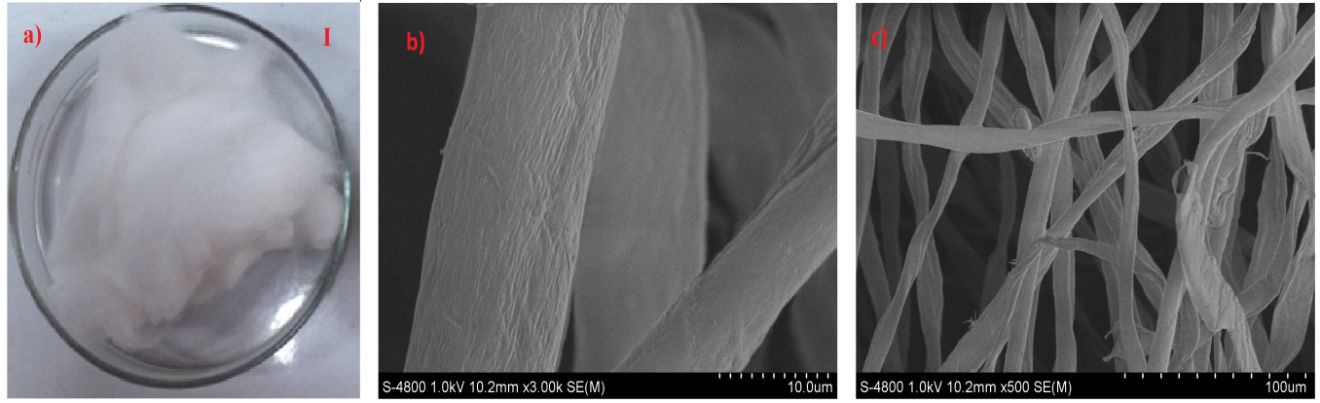
**
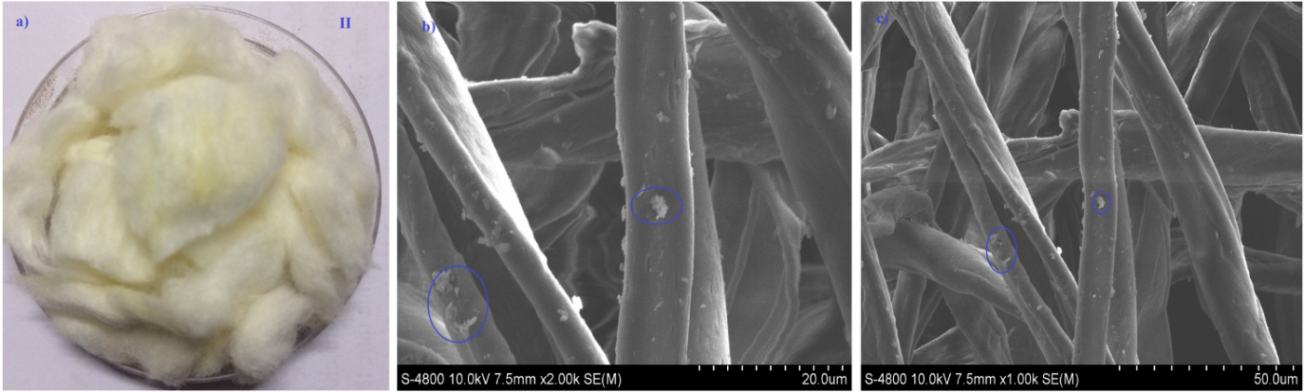
**

**Figure S2**.a)Digital photograph of cotton; (b,c) SEM images of cotton with different magnifications. I-cotton before modification, II-Cotton after modification


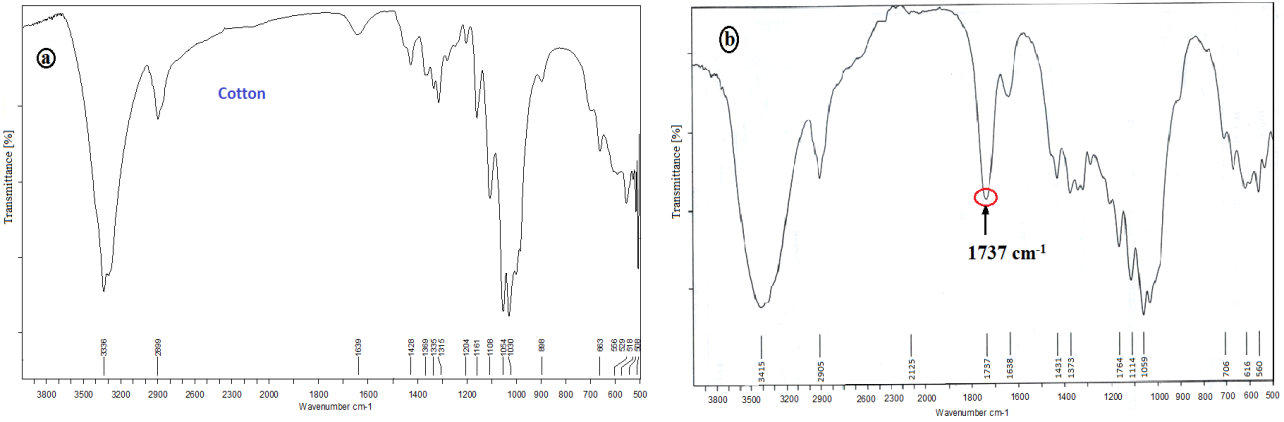


**Figure S3**.FT-IR spectra of cotton before (a) and after (b) modification with CA


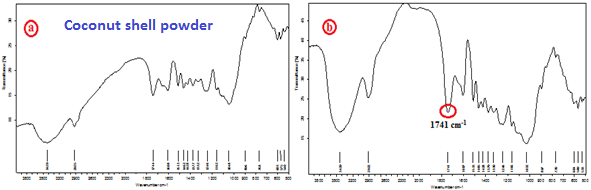


**Figure S4**.FT-IR spectra of coconut shell powder before (a) and after (b) modification with CA [36]

*2.3. Specific surface area by using BET method with nitrogen gas*


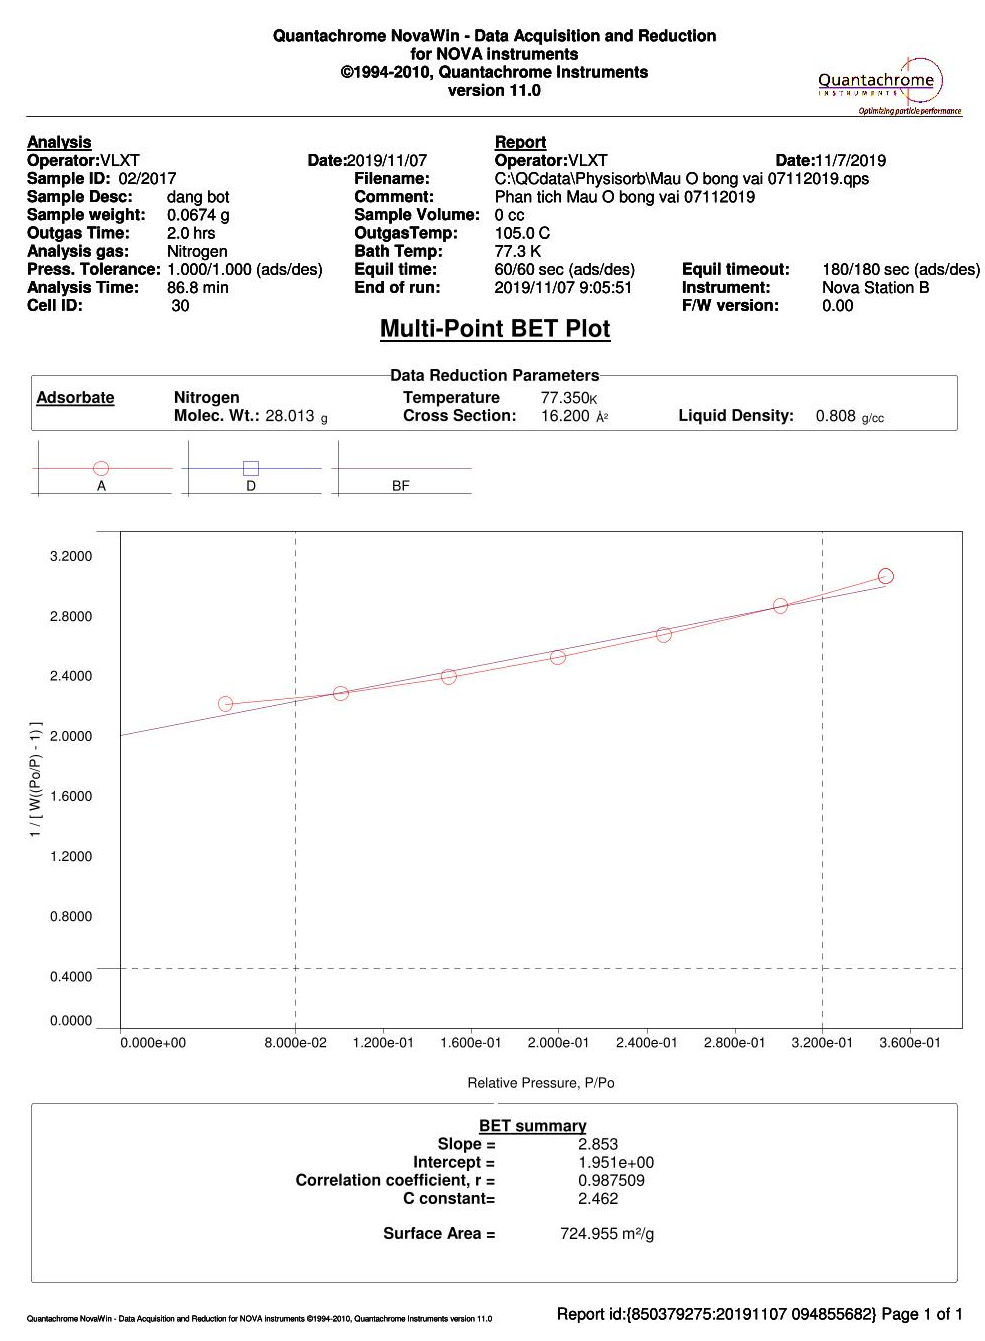


Figure S5. Specific surface area of initial cotton


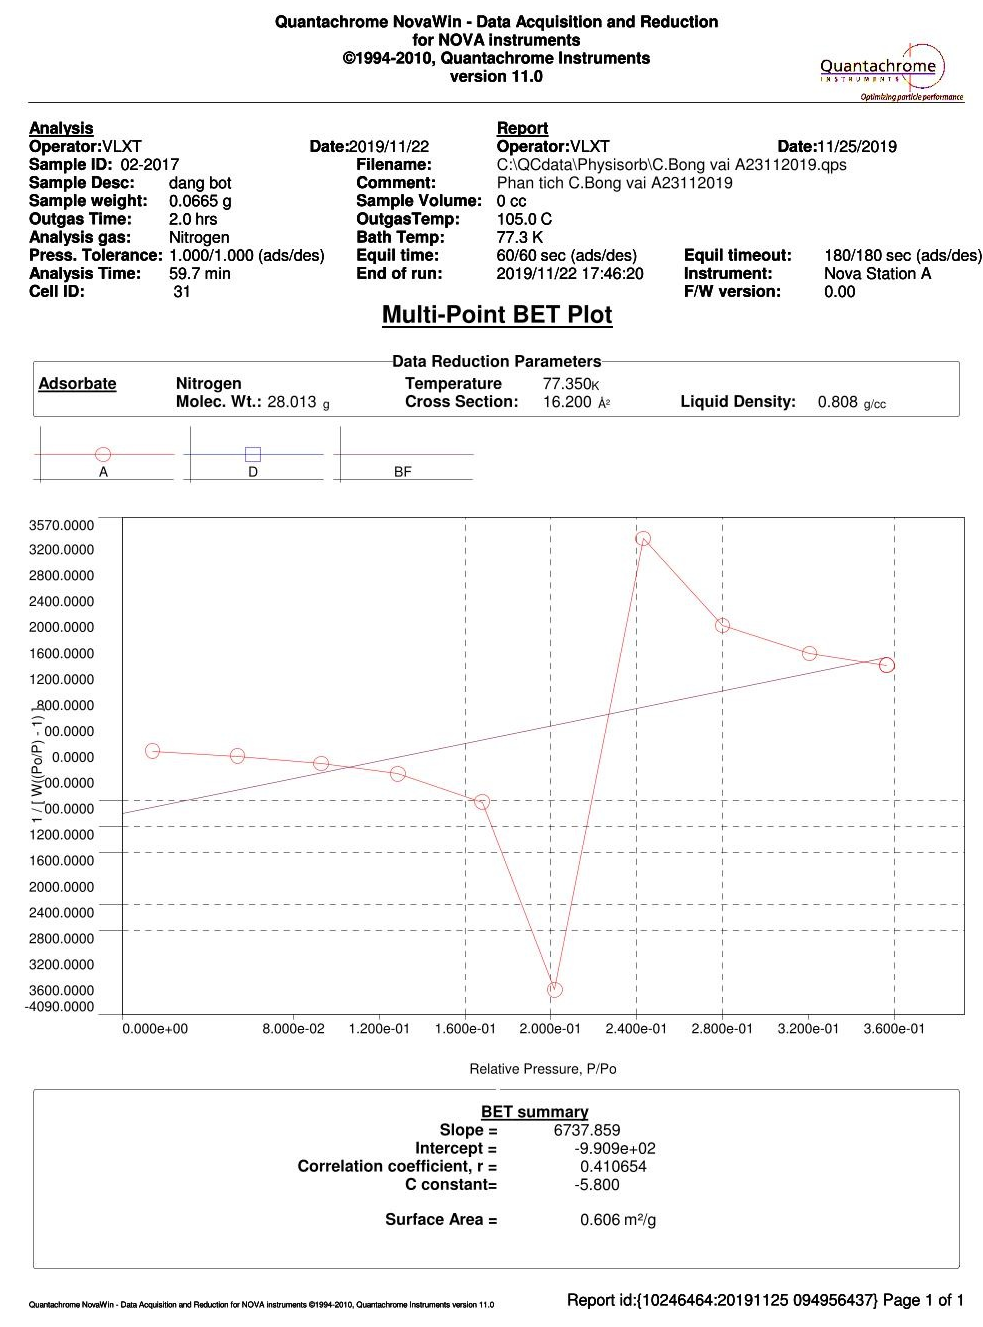


Figure S6. Specific surface area of CA-modified cotton

The specific surface area of initial cotton, which was measured by using Brunauer-Emmett-Teller (BET) method with nitrogen gas, was 724.955 m2/g; while the value of modified cotton was 0.606 m2/g (seen in Figure S5,6). The unusual result could be explained by two reasons: first, the diameter of pores on the surface of modified cotton were reduced, congested and destructed strongly because CA molecules reacted and formed the cross-link between cellulose chains; second, the adsorption of nitrogen gas met a resistant barrier because nitrogen gas, which has a cross-sectional area of 0.162 nm2, was bigger than that of pores.
